# Supplementary material for: Facile room-temperature synthesis of hydroxysulfides for efficient oxygen evolution reaction
Source: Royal Society of Chemistry journal article supplement (doi:10.1039/d5re00397k), 2026-01-01
Supplement: d5re00397k2.zip [file Fig. 2d S-NiFe-LDH-NF XPS.xlsx]

## Sheet: XPS Survey
							Acquisition Parameters :					Experiment Descriptions :
							Parameter					Experiment\X-Ray001 300um - FG ON\2405153765-a3
							Total acquisition time	1 mins 8.0 secs
							Number of Scans	1
﻿							Source Gun Type	Al K Alpha
Axis	Energy	Elements=	1361				Spot Size	300 祄
							Lens Mode	Standard
C:\Users\CSZX\AppData\Local\Temp\VGD{CFCB7E7A-0013-4C36-83C2-C2DAB65894B5}.vgd							Analyser Mode	CAE : Pass Energy 150.0 eV
							Energy Step Size	1.000 eV
							Number of Energy Steps	1361
Binding Energy (E)				Backgnd.
eV		Counts / s		Counts / s
1350.08		204622		0
1349.08		205830		0
1348.08		208079		0
1347.08		206261		0
1346.08		201080		0
1345.08		201046		0
1344.08		202682		0
1343.08		203495		0
1342.08		198418		0
1341.08		197911		0
1340.08		196207		0
1339.08		197436		0
1338.08		198448		0
1337.08		200278		0
1336.08		198498		0
1335.08		196597		0
1334.08		198419		0
1333.08		195003		0
1332.08		198044		0
1331.08		194686		0
1330.08		192382		0
1329.08		192994		0
1328.08		191766		0
1327.08		193561		0
1326.08		187126		0
1325.08		189360		0
1324.08		191101		0
1323.08		187170		0
1322.08		191597		0
1321.08		194245		0
1320.08		191884		0
1319.08		193022		0
1318.08		191438		0
1317.08		191907		0
1316.08		188301		0
1315.08		186816		0
1314.08		186217		0
1313.08		190175		0
1312.08		190900		0
1311.08		189064		0
1310.08		186881		0
1309.08		192698		0
1308.08		186902		0
1307.08		188955		0
1306.08		188472		0
1305.08		186951		0
1304.08		189277		0
1303.08		191732		0
1302.08		189784		0
1301.08		186757		0
1300.08		188408		0
1299.08		190618		0
1298.08		188417		0
1297.08		188332		0
1296.08		188071		0
1295.08		189610		0
1294.08		187874		0
1293.08		194209		0
1292.08		188591		0
1291.08		188091		0
1290.08		190792		0
1289.08		188006		0
1288.08		189669		0
1287.08		188064		0
1286.08		187948		0
1285.08		189974		0
1284.08		188891		0
1283.08		191142		0
1282.08		188591		0
1281.08		184690		0
1280.08		189648		0
1279.08		189109		0
1278.08		187768		0
1277.08		188060		0
1276.08		190217		0
1275.08		189522		0
1274.08		186702		0
1273.08		190792		0
1272.08		189088		0
1271.08		192515		0
1270.08		190808		0
1269.08		193385		0
1268.08		189362		0
1267.08		189266		0
1266.08		190653		0
1265.08		193142		0
1264.08		194661		0
1263.08		194011		0
1262.08		189183		0
1261.08		191130		0
1260.08		192377		0
1259.08		191996		0
1258.08		192771		0
1257.08		193540		0
1256.08		195488		0
1255.08		195275		0
1254.08		192286		0
1253.08		193039		0
1252.08		193598		0
1251.08		192770		0
1250.08		196650		0
1249.08		195136		0
1248.08		195213		0
1247.08		194340		0
1246.08		196876		0
1245.08		196847		0
1244.08		194949		0
1243.08		197337		0
1242.08		196269		0
1241.08		198300		0
1240.08		196274		0
1239.08		200630		0
1238.08		199350		0
1237.08		199495		0
1236.08		198811		0
1235.08		200912		0
1234.08		199896		0
1233.08		200749		0
1232.08		201951		0
1231.08		200223		0
1230.08		203030		0
1229.08		204376		0
1228.08		201307		0
1227.08		202331		0
1226.08		204754		0
1225.08		204109		0
1224.08		204597		0
1223.08		203238		0
1222.08		205961		0
1221.08		203293		0
1220.08		200427		0
1219.08		198243		0
1218.08		197120		0
1217.08		193133		0
1216.08		192762		0
1215.08		193411		0
1214.08		192728		0
1213.08		190452		0
1212.08		190513		0
1211.08		192023		0
1210.08		191023		0
1209.08		191627		0
1208.08		192832		0
1207.08		192246		0
1206.08		190197		0
1205.08		193642		0
1204.08		192719		0
1203.08		189985		0
1202.08		193840		0
1201.08		192385		0
1200.08		193129		0
1199.08		193635		0
1198.08		195351		0
1197.08		193661		0
1196.08		194105		0
1195.08		196783		0
1194.08		196263		0
1193.08		195150		0
1192.08		193940		0
1191.08		196365		0
1190.08		196228		0
1189.08		189837		0
1188.08		193746		0
1187.08		196298		0
1186.08		195547		0
1185.08		195632		0
1184.08		195625		0
1183.08		195964		0
1182.08		198372		0
1181.08		196186		0
1180.08		199730		0
1179.08		195043		0
1178.08		199055		0
1177.08		200194		0
1176.08		198163		0
1175.08		197588		0
1174.08		198116		0
1173.08		196980		0
1172.08		197461		0
1171.08		199338		0
1170.08		203598		0
1169.08		195926		0
1168.08		200072		0
1167.08		201321		0
1166.08		203604		0
1165.08		202452		0
1164.08		203899		0
1163.08		200728		0
1162.08		202294		0
1161.08		203389		0
1160.08		202739		0
1159.08		202016		0
1158.08		205257		0
1157.08		206151		0
1156.08		203469		0
1155.08		201627		0
1154.08		203393		0
1153.08		209085		0
1152.08		206619		0
1151.08		208760		0
1150.08		203049		0
1149.08		202499		0
1148.08		203557		0
1147.08		210112		0
1146.08		204726		0
1145.08		205577		0
1144.08		210854		0
1143.08		209189		0
1142.08		209163		0
1141.08		203778		0
1140.08		207814		0
1139.08		208659		0
1138.08		210517		0
1137.08		210008		0
1136.08		206154		0
1135.08		211257		0
1134.08		207490		0
1133.08		211506		0
1132.08		215390		0
1131.08		210661		0
1130.08		210937		0
1129.08		212039		0
1128.08		212292		0
1127.08		209874		0
1126.08		213472		0
1125.08		214819		0
1124.08		216849		0
1123.08		213957		0
1122.08		213339		0
1121.08		215491		0
1120.08		211905		0
1119.08		214893		0
1118.08		214821		0
1117.08		217413		0
1116.08		218513		0
1115.08		216783		0
1114.08		217080		0
1113.08		218332		0
1112.08		217007		0
1111.08		221307		0
1110.08		219393		0
1109.08		216793		0
1108.08		215679		0
1107.08		222064		0
1106.08		221043		0
1105.08		221985		0
1104.08		218757		0
1103.08		223573		0
1102.08		219682		0
1101.08		221081		0
1100.08		221802		0
1099.08		222341		0
1098.08		223666		0
1097.08		221520		0
1096.08		220984		0
1095.08		222613		0
1094.08		225391		0
1093.08		223688		0
1092.08		221723		0
1091.08		220779		0
1090.08		226070		0
1089.08		224676		0
1088.08		225733		0
1087.08		222502		0
1086.08		228353		0
1085.08		228324		0
1084.08		225720		0
1083.08		227160		0
1082.08		226929		0
1081.08		227098		0
1080.08		227844		0
1079.08		225542		0
1078.08		228146		0
1077.08		230299		0
1076.08		228944		0
1075.08		227231		0
1074.08		230551		0
1073.08		231544		0
1072.08		232440		0
1071.08		231563		0
1070.08		230658		0
1069.08		233369		0
1068.08		236003		0
1067.08		233959		0
1066.08		233184		0
1065.08		233308		0
1064.08		236447		0
1063.08		231534		0
1062.08		232149		0
1061.08		234881		0
1060.08		234604		0
1059.08		236854		0
1058.08		232741		0
1057.08		236856		0
1056.08		235319		0
1055.08		236627		0
1054.08		240321		0
1053.08		237469		0
1052.08		236194		0
1051.08		234213		0
1050.08		235742		0
1049.08		238596		0
1048.08		245874		0
1047.08		244117		0
1046.08		241089		0
1045.08		240982		0
1044.08		240299		0
1043.08		240496		0
1042.08		237597		0
1041.08		240330		0
1040.08		244115		0
1039.08		243365		0
1038.08		240604		0
1037.08		244290		0
1036.08		243584		0
1035.08		246791		0
1034.08		244922		0
1033.08		242448		0
1032.08		242555		0
1031.08		244393		0
1030.08		245214		0
1029.08		244090		0
1028.08		245176		0
1027.08		241943		0
1026.08		244362		0
1025.08		247667		0
1024.08		248491		0
1023.08		249488		0
1022.08		248569		0
1021.08		247311		0
1020.08		246832		0
1019.08		247068		0
1018.08		255002		0
1017.08		250699		0
1016.08		250297		0
1015.08		254524		0
1014.08		252313		0
1013.08		253851		0
1012.08		254408		0
1011.08		255016		0
1010.08		251385		0
1009.08		249826		0
1008.08		250390		0
1007.08		248473		0
1006.08		249996		0
1005.08		248504		0
1004.08		246133		0
1003.08		243279		0
1002.08		252449		0
1001.08		248714		0
1000.08		250964		0
999.08		255464		0
998.08		250282		0
997.08		251259		0
996.08		249409		0
995.08		247180		0
994.08		246425		0
993.08		247378		0
992.08		243954		0
991.08		242867		0
990.08		242584		0
989.08		240750		0
988.08		242493		0
987.08		243794		0
986.08		239668		0
985.08		242030		0
984.08		244004		0
983.08		245259		0
982.08		247096		0
981.08		250647		0
980.08		253159		0
979.08		261006		0
978.08		262053		0
977.08		259623		0
976.08		256712		0
975.08		256633		0
974.08		251619		0
973.08		251450		0
972.08		242995		0
971.08		246422		0
970.08		243568		0
969.08		236363		0
968.08		235893		0
967.08		234856		0
966.08		229297		0
965.08		230637		0
964.08		228914		0
963.08		230342		0
962.08		228060		0
961.08		227388		0
960.08		224681		0
959.08		226458		0
958.08		227827		0
957.08		230630		0
956.08		225810		0
955.08		226126		0
954.08		230283		0
953.08		226234		0
952.08		227670		0
951.08		229584		0
950.08		230872		0
949.08		228820		0
948.08		229106		0
947.08		229632		0
946.08		227609		0
945.08		229970		0
944.08		235268		0
943.08		231358		0
942.08		233876		0
941.08		231207		0
940.08		236179		0
939.08		233035		0
938.08		228164		0
937.08		229531		0
936.08		232089		0
935.08		235272		0
934.08		234590		0
933.08		234558		0
932.08		233471		0
931.08		235618		0
930.08		234689		0
929.08		235433		0
928.08		235073		0
927.08		233486		0
926.08		234128		0
925.08		237237		0
924.08		235021		0
923.08		238249		0
922.08		235514		0
921.08		235363		0
920.08		236553		0
919.08		236302		0
918.08		239131		0
917.08		236265		0
916.08		240001		0
915.08		236395		0
914.08		240603		0
913.08		236989		0
912.08		238986		0
911.08		237362		0
910.08		238320		0
909.08		237771		0
908.08		239286		0
907.08		235709		0
906.08		238797		0
905.08		239882		0
904.08		238577		0
903.08		240770		0
902.08		239549		0
901.08		239603		0
900.08		241143		0
899.08		238403		0
898.08		241249		0
897.08		241808		0
896.08		242611		0
895.08		237731		0
894.08		236637		0
893.08		238680		0
892.08		240353		0
891.08		237110		0
890.08		237159		0
889.08		230689		0
888.08		231846		0
887.08		227309		0
886.08		230149		0
885.08		231472		0
884.08		237337		0
883.08		239831		0
882.08		242371		0
881.08		246422		0
880.08		246789		0
879.08		249291		0
878.08		241059		0
877.08		233972		0
876.08		237755		0
875.08		244930		0
874.08		253649		0
873.08		249662		0
872.08		228667		0
871.08		215348		0
870.08		206373		0
869.08		207791		207791
868.08		209994		207722
867.08		211937		207524
866.08		215325		207203
865.08		217150		206678
864.08		222583		206020
863.08		233335		205035
862.08		237736		203426
861.08		238083		201501
860.08		230541		199460
859.08		226452		197713
858.08		234012		196093
857.08		257907		193992
856.08		285418		190528
855.08		260004		185448
854.08		211188		181473
853.08		188014		179888
852.08		183791		179453
851.08		183201		179220
850.08		180131		179008
849.08		181500		178947
848.08		178812		178812
847.08		181460		178810
846.08		181914		178692
845.08		181590		178550
844.08		181545		178415
843.08		180705		178278
842.08		178171		178171
841.08		178612		0
840.08		177899		0
839.08		179643		0
838.08		175353		0
837.08		177421		0
836.08		175864		0
835.08		180630		0
834.08		178853		0
833.08		177334		0
832.08		174018		0
831.08		175195		0
830.08		175988		0
829.08		172902		0
828.08		173214		0
827.08		176463		0
826.08		173401		0
825.08		172260		0
824.08		172300		0
823.08		174027		0
822.08		173553		0
821.08		171302		0
820.08		173774		0
819.08		173495		0
818.08		172717		0
817.08		174464		0
816.08		172792		0
815.08		174195		0
814.08		173471		0
813.08		175760		0
812.08		174811		0
811.08		171594		0
810.08		171632		0
809.08		174689		0
808.08		173668		0
807.08		171844		0
806.08		174319		0
805.08		170185		0
804.08		174341		0
803.08		173565		0
802.08		170567		0
801.08		172873		0
800.08		172356		0
799.08		174830		0
798.08		172676		0
797.08		172427		0
796.08		171332		0
795.08		174720		0
794.08		171192		0
793.08		173265		0
792.08		171346		0
791.08		171536		0
790.08		170360		0
789.08		172183		0
788.08		175631		0
787.08		174122		0
786.08		171626		0
785.08		177774		0
784.08		177451		0
783.08		178889		0
782.08		174708		0
781.08		175310		0
780.08		176313		0
779.08		175185		0
778.08		172124		0
777.08		172414		0
776.08		170551		0
775.08		168333		0
774.08		170563		0
773.08		171118		0
772.08		166735		0
771.08		163378		0
770.08		162227		0
769.08		156851		0
768.08		156805		0
767.08		157127		0
766.08		154187		0
765.08		154885		0
764.08		155687		0
763.08		157545		0
762.08		157295		0
761.08		156742		0
760.08		156520		0
759.08		151767		0
758.08		154661		0
757.08		155161		0
756.08		155041		0
755.08		152177		0
754.08		153555		0
753.08		153639		0
752.08		154814		0
751.08		150336		0
750.08		153750		0
749.08		150951		0
748.08		151194		0
747.08		150002		0
746.08		150507		0
745.08		148504		0
744.08		147914		0
743.08		148905		0
742.08		151211		0
741.08		149367		0
740.08		148355		0
739.08		149547		0
738.08		151282		0
737.08		148628		0
736.08		149871		0
735.08		151086		0
734.08		151706		0
733.08		149498		0
732.08		148029		0
731.08		147588		0
730.08		146480		0
729.08		147920		0
728.08		152505		0
727.08		150733		0
726.08		156395		0
725.08		153158		0
724.08		151815		0
723.08		147988		0
722.08		150485		0
721.08		145637		0
720.08		143099		0
719.08		144628		0
718.08		146958		0
717.08		145688		0
716.08		147850		0
715.08		151011		0
714.08		152913		0
713.08		156071		0
712.08		157795		0
711.08		152144		0
710.08		143512		0
709.08		131798		0
708.08		129199		0
707.08		124220		0
706.08		120450		0
705.08		118484		0
704.08		118749		0
703.08		118087		0
702.08		110459		0
701.08		108721		0
700.08		107871		0
699.08		110544		0
698.08		109497		0
697.08		106224		0
696.08		106759		0
695.08		107960		0
694.08		106069		0
693.08		104513		0
692.08		105349		0
691.08		103685		0
690.08		104726		0
689.08		108150		0
688.08		105363		0
687.08		102742		0
686.08		103608		0
685.08		101382		0
684.08		103482		0
683.08		102750		0
682.08		101465		0
681.08		104453		0
680.08		106224		0
679.08		105112		0
678.08		102542		0
677.08		103152		0
676.08		103769		0
675.08		106630		0
674.08		104622		0
673.08		106207		0
672.08		104111		0
671.08		104284		0
670.08		107508		0
669.08		106348		0
668.08		107166		0
667.08		105669		0
666.08		106081		0
665.08		106627		0
664.08		106370		0
663.08		107320		0
662.08		105268		0
661.08		104743		0
660.08		105631		0
659.08		103542		0
658.08		103442		0
657.08		106623		0
656.08		102803		0
655.08		104388		0
654.08		101431		0
653.08		105091		0
652.08		109396		0
651.08		107422		0
650.08		108128		0
649.08		109736		0
648.08		115357		0
647.08		117290		0
646.08		120256		0
645.08		123062		0
644.08		123031		0
643.08		118345		0
642.08		116622		0
641.08		115890		0
640.08		111566		0
639.08		105931		0
638.08		104124		0
637.08		97481.9		0
636.08		92190.7		0
635.08		91146.6		0
634.08		85785.9		0
633.08		83910.3		0
632.08		83911		0
631.08		85311.7		0
630.08		86817		0
629.08		85955.9		0
628.08		85618.7		0
627.08		86529.1		0
626.08		83640		0
625.08		85905.4		0
624.08		85593.9		0
623.08		83456.8		0
622.08		82074.9		0
621.08		83092.6		0
620.08		80888.1		0
619.08		79644.4		0
618.08		79177.3		0
617.08		78022.2		0
616.08		78730		0
615.08		78321.8		0
614.08		76536.2		0
613.08		76950.2		0
612.08		77297.5		0
611.08		77561.8		0
610.08		77721		0
609.08		76272.9		0
608.08		78696.2		0
607.08		80130.9		0
606.08		79270.5		0
605.08		79082.7		0
604.08		78582.5		0
603.08		79199.3		0
602.08		79185.6		0
601.08		76935.3		0
600.08		77443		0
599.08		81334.1		0
598.08		78713.8		0
597.08		80618.8		0
596.08		76514		0
595.08		77504.7		0
594.08		79000.5		0
593.08		80153.8		0
592.08		78721.2		0
591.08		79610.9		0
590.08		81467.2		0
589.08		78782.2		0
588.08		78567.1		0
587.08		79198.5		0
586.08		80301		0
585.08		79263.9		0
584.08		78225.9		0
583.08		77463.1		0
582.08		79865.7		0
581.08		81638		0
580.08		79075.5		0
579.08		81761.2		0
578.08		80136.4		0
577.08		79886.7		0
576.08		79379.5		0
575.08		80152.8		0
574.08		81066.1		0
573.08		79924.5		0
572.08		78291.4		0
571.08		78011.5		0
570.08		78705.1		0
569.08		79790.5		0
568.08		80770		0
567.08		77457.4		0
566.08		77376.5		0
565.08		78975		0
564.08		76411.2		0
563.08		77647.3		0
562.08		77477.8		0
561.08		81072.4		0
560.08		84254.6		0
559.08		82053.5		0
558.08		84949.9		0
557.08		85785.9		0
556.08		87274.2		0
555.08		88513.1		0
554.08		86658.2		0
553.08		86850.7		0
552.08		83171.9		0
551.08		81517.4		0
550.08		79392.7		0
549.08		77440.8		0
548.08		74991.1		0
547.08		74813.7		0
546.08		68121.4		0
545.08		65486.5		0
544.08		62803.5		0
543.08		57867		0
542.08		56580.3		0
541.08		56124.9		0
540.08		51976.9		0
539.08		50115.3		0
538.08		49466.6		0
537.08		49279.8		49279.8
536.08		50309.6		49264.1
535.08		59096.8		49228.9
534.08		84102.5		49036.2
533.08		152642		48394.8
532.08		283735		46523.6
531.08		290237		42290.3
530.08		140345		37871.9
529.08		66025.6		36046.3
528.08		44074		35512.1
527.08		39358.5		35359.6
526.08		35841.1		35288.4
525.08		35313		35278.5
524.08		35277.9		35277.9
523.08		35944.9		0
522.08		35083.8		0
521.08		34192.9		0
520.08		33026.5		0
519.08		33925.2		0
518.08		34363.9		0
517.08		34507.5		0
516.08		33782.4		0
515.08		33707.2		0
514.08		35074		0
513.08		34730.1		0
512.08		34183.6		0
511.08		34341.7		0
510.08		34010.3		0
509.08		34417		0
508.08		33763.1		0
507.08		34526.8		0
506.08		35785		0
505.08		34427.2		0
504.08		36162.7		0
503.08		34701.2		0
502.08		34662.1		0
501.08		35692.2		0
500.08		35596.6		0
499.08		35129.7		0
498.08		36490.3		0
497.08		35936.3		0
496.08		35335		0
495.08		36267.1		0
494.08		33725.1		0
493.08		34554.4		0
492.08		33995.8		0
491.08		34674.7		0
490.08		34943.8		0
489.08		35172.8		0
488.08		36098		0
487.08		36314.3		0
486.08		35119		0
485.08		34503.4		0
484.08		34985		0
483.08		34820		0
482.08		35110.3		0
481.08		35911.1		0
480.08		35187.3		0
479.08		34938.5		0
478.08		35426.1		0
477.08		34322.6		0
476.08		35798.2		0
475.08		35339.4		0
474.08		35937.4		0
473.08		35431.7		0
472.08		35847.5		0
471.08		35600		0
470.08		35326.6		0
469.08		34916.6		0
468.08		36001.9		0
467.08		35643.9		0
466.08		35097.7		0
465.08		35027		0
464.08		36497.4		0
463.08		36446.8		0
462.08		36651.2		0
461.08		35836.6		0
460.08		37431.1		0
459.08		35705.3		0
458.08		36092.4		0
457.08		35594.6		0
456.08		36432.6		0
455.08		34997.9		0
454.08		37980.4		0
453.08		37692.6		0
452.08		36581.8		0
451.08		37355		0
450.08		35372		0
449.08		35894.1		0
448.08		35721.2		0
447.08		38156.2		0
446.08		36879.1		0
445.08		37655.9		0
444.08		36719.4		0
443.08		38010.2		0
442.08		36355.8		0
441.08		36833.5		0
440.08		36392.6		0
439.08		38450		0
438.08		37789.8		0
437.08		36457.8		0
436.08		37710.9		0
435.08		37888.5		0
434.08		37429.2		0
433.08		39011.5		0
432.08		36876.1		0
431.08		38431.6		0
430.08		36539.4		0
429.08		38107.1		0
428.08		37548		0
427.08		38424.4		0
426.08		38238.5		0
425.08		38555		0
424.08		37896.9		0
423.08		39103.9		0
422.08		37717.5		0
421.08		36202		0
420.08		39292.6		0
419.08		39756.6		0
418.08		38307		0
417.08		38031.7		0
416.08		36125.9		0
415.08		37136.8		0
414.08		37613.6		0
413.08		38111.1		0
412.08		38913		0
411.08		37696.2		0
410.08		37697.7		0
409.08		37241.2		37241.2
408.08		39546.3		37241.1
407.08		39549.5		37220.1
406.08		38892.3		37198.8
405.08		39430		37183.4
404.08		37162.9		37162.9
403.08		38746.3		37183
402.08		38957.3		37203.2
401.08		41636.1		37223.3
400.08		42861.5		37243.5
399.08		42321.1		37263.6
398.08		39646.3		37283.8
397.08		40028.3		37304
396.08		38219.5		37324.1
395.08		38832.1		37344.3
394.08		39117		37364.4
393.08		39286.1		37384.6
392.08		38152.1		37404.8
391.08		38805.1		37424.9
390.08		37445.1		37445.1
389.08		36590.6		0
388.08		37351.1		0
387.08		39477.6		0
386.08		39140.8		0
385.08		37521.7		0
384.08		39893.5		0
383.08		38695.4		0
382.08		39202.2		0
381.08		39059.5		0
380.08		43729.8		0
379.08		46272.2		0
378.08		48494.7		0
377.08		47275.7		0
376.08		41029.9		0
375.08		40774.5		0
374.08		39958.1		0
373.08		38089.5		0
372.08		39195.8		0
371.08		38702		0
370.08		39549		0
369.08		39332.4		0
368.08		37200.4		0
367.08		38406		0
366.08		39057.8		0
365.08		38083.6		0
364.08		38635.3		0
363.08		38374.9		0
362.08		37924.2		0
361.08		37869.4		0
360.08		39741.1		0
359.08		38396.3		0
358.08		39615.8		0
357.08		38797.6		0
356.08		38479.2		0
355.08		39148.7		0
354.08		38237.9		0
353.08		38611.8		0
352.08		39711.2		0
351.08		40213.6		0
350.08		39653.7		0
349.08		39070.8		0
348.08		41431.2		0
347.08		40862.6		0
346.08		39778.7		0
345.08		38235		0
344.08		40068.5		0
343.08		40613.5		0
342.08		39849.9		0
341.08		40243.8		0
340.08		40936.5		0
339.08		41369.8		0
338.08		39898.6		0
337.08		41519.6		0
336.08		39899.9		0
335.08		40019.1		0
334.08		42370.9		0
333.08		40247.2		0
332.08		40889.4		0
331.08		42612.5		0
330.08		41619.9		0
329.08		43604.3		0
328.08		43766		0
327.08		42082.8		0
326.08		42457.4		0
325.08		42908.9		0
324.08		42765.5		0
323.08		42774.3		0
322.08		43595.6		0
321.08		43545.6		0
320.08		43177.3		0
319.08		44341.5		0
318.08		42754.9		0
317.08		43957.7		0
316.08		43791.5		0
315.08		46406.1		0
314.08		44336.7		0
313.08		43312.7		0
312.08		43537.8		0
311.08		43133		0
310.08		45447.9		0
309.08		44040.7		0
308.08		44264.6		0
307.08		42593.3		0
306.08		43577.8		0
305.08		41684		0
304.08		42597.7		0
303.08		41419.9		0
302.08		41482.2		0
301.08		40984.1		0
300.08		38047.7		38047.7
299.08		39882.3		38215.6
298.08		39348.9		38383.5
297.08		44858.3		38551.3
296.08		51304		38719.2
295.08		50977.8		38887.1
294.08		57282.2		39055
293.08		63322.7		39222.9
292.08		49766.8		39390.7
291.08		39558.6		79117.2
290.08		43335.1		39538.1
289.08		49223.7		39379.5
288.08		50102.2		39002.6
287.08		59059		38579.8
286.08		100946		37820.4
285.08		134644		35534.1
284.08		82401.6		31965
283.08		39391.9		30150.8
282.08		32245.7		29818.1
281.08		30728.7		29730.5
280.08		30329.5		29694.3
279.08		30735.8		29671.3
278.08		30540.2		29632.9
277.08		29600.3		29600.3
276.08		30381.9		0
275.08		29920.3		0
274.08		28933.6		0
273.08		30247.5		0
272.08		29069.6		0
271.08		29897.6		0
270.08		29618		0
269.08		31123.8		0
268.08		30912.6		0
267.08		29451.3		0
266.08		29293.8		0
265.08		29710.2		0
264.08		31107.1		0
263.08		30675.1		0
262.08		30719.7		0
261.08		30200.2		0
260.08		29240.6		0
259.08		29830.5		0
258.08		31057		0
257.08		28836.9		0
256.08		30944.7		0
255.08		31280.7		0
254.08		29250.2		0
253.08		31275.5		0
252.08		30922.8		0
251.08		31135.4		0
250.08		30492.4		0
249.08		29065		0
248.08		30548.4		0
247.08		30780.2		0
246.08		29645.8		0
245.08		28857		0
244.08		30845.7		0
243.08		29971.9		0
242.08		30614.4		0
241.08		30841.8		0
240.08		31397.9		0
239.08		29027.8		0
238.08		31329.8		0
237.08		30987.3		0
236.08		29702.8		0
235.08		31246.7		0
234.08		33381.1		0
233.08		35781.4		0
232.08		34793.8		0
231.08		33538.8		0
230.08		32282.4		0
229.08		31540.4		0
228.08		32020.9		0
227.08		32190.3		0
226.08		30428		0
225.08		30180.2		0
224.08		31186.5		0
223.08		29824.3		0
222.08		30818.9		0
221.08		31139.1		0
220.08		31070.4		0
219.08		30737.1		0
218.08		30923.9		0
217.08		31641.2		0
216.08		30675.3		0
215.08		30702.2		0
214.08		31201.2		0
213.08		30414.1		0
212.08		30550.8		0
211.08		29528.8		0
210.08		30424.4		0
209.08		29528.3		0
208.08		30374.8		0
207.08		31220.4		0
206.08		30868.4		0
205.08		30397.7		0
204.08		30939.5		0
203.08		31803.4		0
202.08		30909.8		0
201.08		30868.4		0
200.08		31150.8		0
199.08		31382.6		0
198.08		33463.2		0
197.08		32154.9		0
196.08		31980.1		0
195.08		30610		0
194.08		30722.3		0
193.08		31880.6		0
192.08		32379.6		0
191.08		31389.1		0
190.08		31005.9		0
189.08		31117.1		0
188.08		31457.9		0
187.08		30762.7		0
186.08		31092		0
185.08		31983.4		0
184.08		30972.1		0
183.08		31296.6		0
182.08		31259.7		0
181.08		31179.1		0
180.08		31270.5		0
179.08		30823.4		0
178.08		29210.7		0
177.08		30223		0
176.08		31160.1		0
175.08		32365.1		0
174.08		30191.8		30191.8
173.08		31419.8		30191.4
172.08		30922.1		30178.5
171.08		34213.1		30170.5
170.08		38715.8		30128.7
169.08		42796.8		30040.4
168.08		37482.7		29909.5
167.08		33540.1		29831.8
166.08		31206.2		29793.7
165.08		31039.8		29779.1
164.08		34266.1		29766.1
163.08		33448.8		29719.9
162.08		32229.8		29681.6
161.08		30868.3		29655.5
160.08		30141.5		29643.1
159.08		30276.4		29638
158.08		29631.4		29631.4
157.08		32734.1		0
156.08		32578.2		0
155.08		34439.4		0
154.08		34373.4		0
153.08		35754		0
152.08		32386.6		0
151.08		32082.9		0
150.08		31570.5		0
149.08		32133.6		0
148.08		31487.1		0
147.08		31438.9		0
146.08		31023.3		0
145.08		32948.3		0
144.08		29836.9		0
143.08		32078.9		0
142.08		30864.4		0
141.08		30991.2		0
140.08		32758		0
139.08		31896.7		0
138.08		31650.5		0
137.08		31278.3		0
136.08		31975.8		0
135.08		30964.2		0
134.08		30668		0
133.08		31333.3		0
132.08		31464.7		0
131.08		29809.9		0
130.08		30978.4		0
129.08		31201		0
128.08		29467.8		0
127.08		31294.8		0
126.08		30585.4		0
125.08		31119.7		0
124.08		33061		0
123.08		32624.1		0
122.08		34206.3		0
121.08		33827.6		0
120.08		34438.4		0
119.08		35250.9		0
118.08		36293.8		0
117.08		35357.9		0
116.08		35687.5		0
115.08		38728.9		0
114.08		40326.9		0
113.08		39625.1		0
112.08		35570.3		0
111.08		32075.4		0
110.08		30374.4		0
109.08		29528.5		0
108.08		29173.4		29173.4
107.08		29459.1		29172.9
106.08		29927.9		29166.2
105.08		29741.3		29149.1
104.08		31210.6		29135.8
103.08		33428.1		29090.2
102.08		32863.6		28995.5
101.08		30856.8		28911.2
100.08		29661.8		28868.8
99.08		29192.9		28851.5
98.08		29734.8		28844
97.08		29412.6		28824.6
96.08		28811.8		28811.8
95.08		29001.5		28814
94.08		28816.2		28816.2
93.08		29071.7		0
92.08		28296.5		0
91.08		28638.1		0
90.08		29573.4		0
89.08		29431.3		0
88.08		27447.8		0
87.08		26145.1		0
86.08		26626.2		0
85.08		25822		0
84.08		26787.8		0
83.08		25918		0
82.08		26613.4		0
81.08		27629.7		0
80.08		26160.4		0
79.08		25938.1		0
78.08		25262.5		0
77.08		27505.1		0
76.08		28773.4		0
75.08		29814.4		0
74.08		31453.9		0
73.08		31575		0
72.08		33067.6		0
71.08		35252		0
70.08		40601		0
69.08		46518.4		0
68.08		38737		0
67.08		26217.1		0
66.08		20239.4		0
65.08		17240.4		0
64.08		15734.9		0
63.08		14311.2		0
62.08		14289.3		0
61.08		13873.7		0
60.08		15379.3		0
59.08		16621.7		0
58.08		17969.9		0
57.08		19064.5		0
56.08		16614.2		0
55.08		12473.3		0
54.08		10642.9		0
53.08		10804.6		0
52.08		10330.9		0
51.08		10040		0
50.08		9529.29		0
49.08		10041.9		0
48.08		9748.09		0
47.08		9572.56		0
46.08		9927.31		0
45.08		9965.4		0
44.08		10074.7		0
43.08		9818.64		0
42.08		8291.15		0
41.08		9106.59		0
40.08		9280.68		0
39.08		8583.46		0
38.08		8149.55		0
37.08		7776.78		0
36.08		8999.81		0
35.08		9464.61		0
34.08		10445.2		0
33.08		10728.5		0
32.08		8615.82		0
31.08		8669		0
30.08		9420.89		0
29.08		10184.5		0
28.08		11067.8		0
27.08		12639.8		0
26.08		14093		0
25.08		14462.6		0
24.08		13287.2		0
23.08		11253.5		0
22.08		8854.73		0
21.08		7038.87		0
20.08		7829.52		0
19.08		9206.29		0
18.08		9212.58		0
17.08		8366.63		0
16.08		6570.47		0
15.08		6039.09		0
14.08		6808.15		0
13.08		7638.74		0
12.08		8677.24		0
11.08		8821.58		0
10.08		8379.82		0
9.08		8769.24		0
8.08		9335.53		0
7.08		9427.07		0
6.08		11146.9		0
5.08		12607.2		0
4.08		11838		0
3.08		7656.12		0
2.08		2660.14		0
1.08		1019.12		0
0.08		435.673		0
-0.92		243.661		0
-1.92		153.166		0
-2.92		55.717		0
-3.92		75.6225		0
-4.92		43.7986		0
-5.92		0		0
-6.92		21.9104		0
-7.92		22.5371		0
-8.92		43.0839		0
-9.92		42.9655		0

## Sheet: S2p Scan
							Acquisition Parameters :					Experiment Descriptions :
							Parameter					Experiment\X-Ray001 300um - FG ON\2405153765-a3
							Total acquisition time	45.3 secs
							Number of Scans	5
﻿							Source Gun Type	Al K Alpha
Axis	Energy	Elements=	181				Spot Size	300 祄
							Lens Mode	Standard
C:\Users\CSZX\AppData\Local\Temp\VGD{834B343A-B5F6-4D48-8E10-D08095789464}.vgd							Analyser Mode	CAE : Pass Energy 60.0 eV
							Energy Step Size	0.100 eV
							Number of Energy Steps	181
Binding Energy (E)				Backgnd.
eV		Counts / s		Counts / s
174.88		7713.34		0
174.78		7608.36		7485.17
174.68		7324.47		7485.17
174.58		7294.5		7485.17
174.48		7450.27		7485.17
174.38		7593.54		7485.17
174.28		7493.14		7485.16
174.18		7501.17		7485.1
174.08		8068.23		7484.99
173.98		7876.1		7484.88
173.88		7677.81		7484.77
173.78		7492.75		7484.66
173.68		7484.28		7484.62
173.58		7311.37		7484.61
173.48		7424.91		7484.6
173.38		7832.47		7484.58
173.28		7593.19		7484.54
173.18		7672.3		7484.48
173.08		7536.76		7484.41
172.98		7481.16		7484.38
172.88		7436.46		7484.34
172.78		7677.11		7484.31
172.68		7595.41		7484.27
172.58		7617.12		7484.23
172.48		7530.02		7484.16
172.38		7714.57		7484.08
172.28		7809.52		7483.98
172.18		7859.97		7483.85
172.08		7898.45		7483.7
171.98		7641.76		7483.57
171.88		7646.19		7483.45
171.78		7584.54		7483.36
171.68		7598.45		7483.27
171.58		7937.29		7483.16
171.48		7832.73		7483.02
171.38		7873.23		7482.87
171.28		7817.54		7482.67
171.18		7996.28		7482.48
171.08		7984.59		7482.25
170.98		8137.81		7482.02
170.88		7903.71		7481.76
170.78		8205.18		7481.46
170.68		8360.59		7481.1
170.58		8610.14		7480.74
170.48		8172.87		7480.34
170.38		8390.65		7479.89
170.28		8602.64		7479.39
170.18		8997.04		7478.85
170.08		9025.25		7478.22
169.98		9167.11		7477.51
169.88		9146.94		7476.71
169.78		9643.17		7475.85
169.68		9535.64		7474.97
169.58		9346.31		7474.07
169.48		9383.3		7473.08
169.38		9986.15		7472.06
169.28		10093		7470.95
169.18		10387.9		7469.79
169.08		10001.4		7468.52
168.98		10416		7467.24
168.88		10219.7		7465.91
168.78		10577.8		7464.57
168.68		10445.8		7463.2
168.58		10294.6		7461.84
168.48		10403.7		7460.46
168.38		10377.2		7459.12
168.28		10193.3		7457.79
168.18		10193.8		7456.51
168.08		9853.76		7455.29
167.98		9754.79		7454.15
167.88		9507		7453.08
167.78		9390.4		7452.09
167.68		9429.43		7451.16
167.58		9140.44		7450.32
167.48		8832.39		7449.53
167.38		8901.09		7448.81
167.28		8655.52		7448.17
167.18		8541.51		7447.61
167.08		8288.71		7447.11
166.98		8264.68		7446.69
166.88		7996.16		7446.31
166.78		8114.32		7445.97
166.68		8248.61		7445.64
166.58		8122.85		7445.34
166.48		7963.38		7445.04
166.38		7962.88		7444.75
166.28		8040.46		7444.5
166.18		7838.13		7444.27
166.08		7888.91		7444.05
165.98		7810.81		7443.86
165.88		7655.03		7443.72
165.78		7544.77		7443.56
165.68		8072.57		7443.4
165.58		7840.46		7443.23
165.48		7891.72		7443.06
165.38		7713.34		7442.85
165.28		7923.42		7442.66
165.18		7915.66		7442.48
165.08		7638.15		7442.3
164.98		7925.51		7442.06
164.88		8377.06		7441.81
164.78		8087.75		7441.53
164.68		8114.86		7441.2
164.58		8265.17		7440.84
164.48		8265.78		7440.5
164.38		8077.7		7440.15
164.28		8185.48		7439.79
164.18		8318.51		7439.42
164.08		8350.01		7439.07
163.98		8016.99		7438.67
163.88		8549.57		7438.26
163.78		8383.55		7437.83
163.68		8461.4		7437.4
163.58		8439.44		7436.91
163.48		8545.78		7436.45
163.38		8297.56		7435.99
163.28		8400.83		7435.53
163.18		8375.74		7435.08
163.08		8425.93		7434.65
162.98		8247.67		7434.22
162.88		8384.73		7433.76
162.78		8622.46		7433.29
162.68		8589.06		7432.81
162.58		8427.52		7432.33
162.48		8242.38		7431.87
162.38		8287.36		7431.42
162.28		8396.28		7430.98
162.18		8499.22		7430.58
162.08		8040.07		7430.17
161.98		8375.97		7429.75
161.88		8355.45		7429.34
161.78		8271.92		7428.96
161.68		8150.09		7428.6
161.58		7833.52		7428.31
161.48		7694.59		7428.04
161.38		8075.2		7427.81
161.28		7819.02		7427.61
161.18		7848.91		7427.4
161.08		7977.83		7427.17
160.98		7888.3		7426.98
160.88		7668.61		7426.79
160.78		7695.51		7426.63
160.68		7611.92		7426.52
160.58		7530.79		7426.45
160.48		7375.95		7426.41
160.38		7280.1		7426.4
160.28		7446.93		7426.4
160.18		7526.56		7426.37
160.08		7873.05		7426.3
159.98		7675.37		7426.21
159.88		7560.64		7426.09
159.78		7813		7425.95
159.68		7689.65		7425.85
159.58		7449.61		7425.78
159.48		7444.87		7425.7
159.38		7535.09		7425.65
159.28		7555.85		7425.65
159.18		7167.66		7431.06
159.08		7424.78		7436.48
158.98		7447.92		7441.89
158.88		7595.61		7447.3
158.78		7578.61		7452.72
158.68		7573.5		7458.13
158.58		7661.81		7463.54
158.48		7517.71		7468.96
158.38		7585.14		7474.37
158.28		7541.08		7479.78
158.18		7510.9		7485.2
158.08		7722.45		7490.61
157.98		7658.54		7496.02
157.88		7503.1		7501.44
157.78		7306.19		7506.85
157.68		7822.22		7512.26
157.58		7592.51		7517.68
157.48		7634.15		7523.09
157.38		7967.91		7528.5
157.28		7737.15		7533.92
157.18		7574.31		7539.33
157.08		7489.24		7544.74
156.98		7503.8		7550.16
156.88		7633.27		0

## Sheet: O1s Scan
							Acquisition Parameters :					Experiment Descriptions :
							Parameter					Experiment\X-Ray001 300um - FG ON\2405153765-a3
							Total acquisition time	50.3 secs
							Number of Scans	5
﻿							Source Gun Type	Al K Alpha
Axis	Energy	Elements=	201				Spot Size	300 祄
							Lens Mode	Standard
C:\Users\CSZX\AppData\Local\Temp\VGD{E56530D2-8A26-4D5A-8D36-C3340861105A}.vgd							Analyser Mode	CAE : Pass Energy 60.0 eV
							Energy Step Size	0.100 eV
							Number of Energy Steps	201
Binding Energy (E)				Backgnd.
eV		Counts / s		Counts / s
544.88		16034.9		0
544.78		16600.9		16386.9
544.68		16575.4		16296.2
544.58		16336.5		16206.8
544.48		16183.5		16092.3
544.38		16233.1		15937.9
544.28		16444.5		15821.1
544.18		15744		15717.9
544.08		15836.1		15615.5
543.98		15827.1		15514.6
543.88		15865.1		15442.2
543.78		15822.5		15333.6
543.68		15760		15221.1
543.58		15433.4		15133.9
543.48		15190.1		15073.7
543.38		14948.6		15009.8
543.28		15594.7		14946.9
543.18		15418.4		14886.8
543.08		15052.2		14821.4
542.98		14985.2		14752
542.88		14618.3		14707.6
542.78		14771.8		14676.8
542.68		14756.4		14646.7
542.58		14794.5		14608.6
542.48		14971.9		14543.1
542.38		14709.2		14470.8
542.28		14433.5		14383.2
542.18		14500.6		14302
542.08		14238.7		14238.1
541.98		14332.1		14175.2
541.88		14341		14121.8
541.78		13983		14078.9
541.68		14083.1		14045.4
541.58		13884.5		13983.1
541.48		14363		13952.7
541.38		13793		13917.1
541.28		13849		13888.1
541.18		13865.3		13869.6
541.08		13683.9		13864
540.98		14156.7		13811.7
540.88		13923.3		13724.2
540.78		13713.4		13614.1
540.68		13531		13524.4
540.58		13088.6		13502.9
540.48		13365.7		13484.4
540.38		13815.9		13393.4
540.28		13621		13374.5
540.18		13075.8		13322.5
540.08		12994.3		13169.2
539.98		13105.5		13084.6
539.88		13049.1		13079.3
539.78		13198.4		13059.7
539.68		13214.8		13020.9
539.58		13144		12962
539.48		13187.8		12900.8
539.38		12770.1		12830.8
539.28		13014		12746.7
539.18		13081.8		12674
539.08		12561.6		12605.3
538.98		12775.5		12523.9
538.88		12639.4		12452.9
538.78		12483		12415.3
538.68		12237.7		12368.2
538.58		12528.6		12321.6
538.48		12552.6		12281.3
538.38		12338.6		12257.4
538.28		12049.3		12219.3
538.18		12357.2		12199.3
538.08		12092.8		12171.9
537.98		12158.5		12164.2
537.88		12201.9		12061.7
537.78		12253.5		11983.9
537.68		11764.2		11856.2
537.58		11832.9		11750.7
537.48		11480.5		11700.5
537.38		11548.8		11699.3
537.28		11876.2		11692.4
537.18		11830.1		11670.8
537.08		12016.3		11641
536.98		11496.8		11610.5
536.88		11422.4		11587.4
536.78		11621		11569.8
536.68		11644.1		11569.5
536.58		11664.4		11569.2
536.48		11632.3		11568.9
536.38		11551.7		11568.6
536.28		11558.4		11568.3
536.18		11588.6		11568
536.08		11695.4		11567.6
535.98		11810.6		11567.2
535.88		11664.8		11566.6
535.78		12174.7		11566
535.68		12065.4		11565
535.58		12601.3		11563.9
535.48		12403.1		11562.6
535.38		12324.8		11561.1
535.28		12765.7		11559.6
535.18		12248.4		11558
535.08		12891.3		11556.1
534.98		13568.1		11553.9
534.88		13573.5		11551.3
534.78		13847.1		11548.1
534.68		14336.1		11544.5
534.58		14772.7		11540.3
534.48		15282.8		11535.6
534.38		15720.5		11530.2
534.28		16198.6		11524.2
534.18		16618.1		11517.6
534.08		16998.3		11510.2
533.98		17929.1		11502
533.88		18715.9		11492.9
533.78		19385.8		11482.6
533.68		20766.4		11471.2
533.58		21172.5		11458.6
533.48		22277.6		11444.7
533.38		23342.3		11429.3
533.28		24854.8		11412.4
533.18		26052.8		11393.5
533.08		28193.8		11372.7
532.98		29434.1		11349.7
532.88		31058.9		11324.1
532.78		34080.5		11295.8
532.68		36101.4		11264.4
532.58		39139.3		11229.3
532.48		42707.5		11190
532.38		46364.1		11146
532.28		51135.8		11096.7
532.18		55032.2		11041.8
532.08		59223.5		10980.9
531.98		64218.1		10913.7
531.88		69320.7		10840.2
531.78		73847.2		10759.7
531.68		79819.3		10672.6
531.58		83043.8		10579.5
531.48		85821.4		10480.6
531.38		89565.2		10376.7
531.28		91829.3		10269.3
531.18		92217.3		10159.4
531.08		91591.8		10048.3
530.98		89942		9937.26
530.88		88431.6		9828.21
530.78		84187.1		9722.27
530.68		80423.7		9620.61
530.58		75491.9		9524.76
530.48		68332.7		9435.64
530.38		63446.8		9353.98
530.28		56633.7		9280.16
530.18		51512.5		9214.21
530.08		46434.3		9155.64
529.98		41202.6		9104.18
529.88		37239.6		9059.04
529.78		33388.9		9019.64
529.68		30440		8985.26
529.58		27905.6		8955.07
529.48		25830.3		8928.6
529.38		23542		8905.33
529.28		21605.8		8884.93
529.18		19869.4		8866.94
529.08		19045.9		8851.01
528.98		18248.2		8837.02
528.88		16404		8824.72
528.78		15389.3		8813.95
528.68		14214.3		8804.67
528.58		13606.8		8796.83
528.48		12922		8790.1
528.38		12363.7		8784.4
528.28		11560.6		8779.5
528.18		11329.9		8775.32
528.08		10908.8		8771.77
527.98		10632.1		8768.77
527.88		10360		8766.09
527.78		10362.4		8763.83
527.68		9811.54		8761.85
527.58		9862.36		8760.16
527.48		9564.83		8758.79
527.38		9166.47		8757.7
527.28		9368.48		8756.75
527.18		9289.98		8755.94
527.08		9320.01		8755.23
526.98		9219.84		8754.49
526.88		9290.58		8753.86
526.78		8925.95		8753.34
526.68		8919.07		8752.95
526.58		8830.72		8752.66
526.48		8853.44		8752.52
526.38		8737.16		8752.36
526.28		8983.46		8752.25
526.18		8765.12		8752.14
526.08		8832.57		8752.1
525.98		8600.37		8752.03
525.88		8814.73		8751.98
525.78		8930.69		8751.84
525.68		9101		8751.67
525.58		8918.24		8751.47
525.48		8725.42		8751.3
525.38		8720.34		8751.17
525.28		8761.24		8751.17
525.18		8447.66		8751.17
525.08		8843.27		8751.17
524.98		8919.92		8751.17
524.88		8793.82		0

## Sheet: Ni2p Scan
							Acquisition Parameters :					Experiment Descriptions :
							Parameter					Experiment\X-Ray001 300um - FG ON\2405153765-a3
							Total acquisition time	1 mins 52.8 secs
							Number of Scans	5
﻿							Source Gun Type	Al K Alpha
Axis	Energy	Elements=	451				Spot Size	300 祄
							Lens Mode	Standard
C:\Users\CSZX\AppData\Local\Temp\VGD{CD8CF8D7-CDAE-4ACC-8B92-9A8DF479FB4C}.vgd							Analyser Mode	CAE : Pass Energy 60.0 eV
							Energy Step Size	0.100 eV
							Number of Energy Steps	451
Binding Energy (E)				Backgnd.
eV		Counts / s		Counts / s
889.88		62405.8		0
889.78		62096.2		62203.2
889.68		62414.6		61870.9
889.58		61896.3		61867
889.48		61076.6		61821.6
889.38		62005.7		61714.6
889.28		62138.5		61661
889.18		61675.5		61658.5
889.08		61408.9		61605.7
888.98		61394.9		61539.5
888.88		61844		61518.8
888.78		61510.4		61512.6
888.68		61435.9		61501.7
888.58		61386.3		61457.4
888.48		61857		61398.9
888.38		61823		61316
888.28		61609.1		61217.3
888.18		61288.2		61071.7
888.08		61740.2		60939.6
887.98		60953		60816.9
887.88		61064.3		60738.9
887.78		60268.2		60674.9
887.68		60688.9		60640.7
887.58		60919		60609.9
887.48		60730.4		60596.1
887.38		60614.2		60572.1
887.28		60372.5		60538.2
887.18		60754.9		60509.2
887.08		60679.7		60502.5
886.98		60201.9		60494.6
886.88		60598.1		60472.9
886.78		60583.3		60441.5
886.68		60834.9		60439.6
886.58		59989.4		60436.5
886.48		61060.3		60432.5
886.38		61177.5		60427.4
886.28		61366.3		60422.3
886.18		60838.7		60416.2
886.08		60611.6		60411.1
885.98		60250.7		60407
885.88		60403.8		60403.9
885.78		60644.1		60401
885.68		60594.2		60398.2
885.58		60509.2		60394.5
885.48		60941		60390.3
885.38		60597.9		60385.8
885.28		60888.4		60381.1
885.18		60694.6		60376.4
885.08		60433.3		60371.6
884.98		60994.5		60365.9
884.88		61156.6		60360.1
884.78		60955		60353.8
884.68		61027.4		60346.5
884.58		60999.5		60338.8
884.48		61344		60330.7
884.38		61303.6		60321.7
884.28		61569.4		60312.2
884.18		61319.7		60302.3
884.08		61250.9		60292.6
883.98		61082.3		60282.8
883.88		61333.3		60272.3
883.78		61984.1		60260.3
883.68		62353.1		60246.8
883.58		62293.9		60231.9
883.48		61970.4		60215.4
883.38		62408.2		60199.4
883.28		61500.3		60182.7
883.18		62835		60164.5
883.08		63225.2		60145.8
882.98		62229.8		60125.9
882.88		63160.7		60104.1
882.78		62801.5		60081.6
882.68		63248.5		60058.3
882.58		63635.9		60033.1
882.48		63520.7		60007.3
882.38		63425.1		59980.1
882.28		63650.9		59951.2
882.18		64426		59922.2
882.08		63480.2		59892
881.98		64299		59861.4
881.88		63472.2		59830
881.78		64138.1		59799.5
881.68		63610.1		59767.4
881.58		64455.5		59733.5
881.48		65511.7		59696.8
881.38		65245.5		59658.4
881.28		65287.1		59616.8
881.18		65639.1		59574.4
881.08		64931		59531.7
880.98		65460.6		59488.2
880.88		65667.4		59443.7
880.78		65778.3		59399.4
880.68		65248.2		59353.6
880.58		65822.8		59306.6
880.48		66113.2		59258.8
880.38		65991.1		59209.7
880.28		66530.5		59159.6
880.18		65765.3		59109.8
880.08		65342.8		59060.2
879.98		65680.5		59009.9
879.88		66318.7		58960.7
879.78		65453.9		58911.5
879.68		65588.1		58860.5
879.58		66353.9		58808.6
879.48		66097.6		58757.8
879.38		65285.4		58705.7
879.28		66150.9		58652.4
879.18		66268		58597.5
879.08		67165.3		58542.8
878.98		65764.7		58486.7
878.88		66063		58429.7
878.78		66518.6		58372.2
878.68		66331.8		58316.5
878.58		65573.2		58260.6
878.48		65713.7		58205
878.38		65558.1		58149.8
878.28		65978.1		58096
878.18		65037		58043.1
878.08		64679.1		57991.8
877.98		64304.2		57942.5
877.88		63839.5		57895.2
877.78		64282.9		57849.1
877.68		63925.8		57803.3
877.58		64288.8		57758.3
877.48		63467.5		57713
877.38		63838.9		57668.9
877.28		63249.1		57625
877.18		63511.7		57582
877.08		63454.2		57539.8
876.98		62681.8		57497.6
876.88		63603.8		57456.2
876.78		62513.5		57416.6
876.68		61979.1		57379.3
876.58		61636.1		57342.7
876.48		61912.9		57307.3
876.38		62609.9		57272.2
876.28		62140.8		57236.8
876.18		61944		57200.1
876.08		62476.8		57162.2
875.98		62624.6		57123.5
875.88		62983.9		57084.5
875.78		62200.2		57044.3
875.68		62656.7		57003.1
875.58		62975.8		56961.2
875.48		62884.1		56918.6
875.38		63405		56874
875.28		63428.6		56828.4
875.18		63169.3		56781.3
875.08		63804.8		56732.7
874.98		63808.1		56683.4
874.88		63711.3		56632.5
874.78		64369.5		56579.4
874.68		64489.7		56525.3
874.58		64362.7		56468.6
874.48		65376.2		56409.4
874.38		65346.8		56347
874.28		66371.1		56283.1
874.18		65325.5		56217.3
874.08		65504.6		56149.5
873.98		66502.2		56079.6
873.88		66572.6		56007.7
873.78		67545.6		55932.4
873.68		67477.6		55853.7
873.58		67622.9		55772.1
873.48		68328.4		55687.9
873.38		68042.5		55602.2
873.28		68296.3		55514.5
873.18		68590.5		55425.4
873.08		68175.7		55335.8
872.98		68354.9		55245.2
872.88		68449		55154.6
872.78		67775.2		55063.9
872.68		68386		54974
872.58		67132.1		54886.5
872.48		66207.4		54801.8
872.38		66064.9		54721.1
872.28		64500.1		54646
872.18		63914.2		54575
872.08		63844.3		54507.8
871.98		63184.3		54446.1
871.88		61647.8		54388.5
871.78		61322.8		54336.1
871.68		59876.4		54290.8
871.58		58448.2		54250.7
871.48		59166.2		54215.5
871.38		57936.7		54186.1
871.28		56952.1		54160.7
871.18		56769.6		54138
871.08		56424		54118.4
870.98		56821.8		54101.1
870.88		56146.2		54086.1
870.78		55216.2		54072.6
870.68		55608.9		54061.5
870.58		54624.3		54053.5
870.48		54462.7		54047.3
870.38		54852.7		54042
870.28		54555.2		54037.6
870.18		54878.3		54033.5
870.08		54442.3		54029.5
869.98		54279		54025.7
869.88		54768.2		54021.9
869.78		54533.1		54018.6
869.68		54472.7		54015.2
869.58		54525		54011.9
869.48		54113		54009.4
869.38		54237.7		54007.8
869.28		53923.4		54006.4
869.18		54235.1		54005.8
869.08		53972.4		54004.3
868.98		53660.2		54002.9
868.88		54237.7		54000.3
868.78		55155.2		53997
868.68		55114.2		53993.2
868.58		54599.8		53988.3
868.48		54890.5		53983.3
868.38		54206.5		53978.6
868.28		54820.5		53974.1
868.18		54801.6		53969.3
868.08		54942.5		53964.7
867.98		54709.6		53959.8
867.88		54361.4		53955.2
867.78		54557		53950
867.68		55375.2		53944.7
867.58		55013.8		53939.3
867.48		54781.3		53933.5
867.38		54808.7		53926.9
867.28		55533.2		53920.1
867.18		55390		53912.7
867.08		55804.8		53905
866.98		55096.6		53896.4
866.88		55752.3		53887.4
866.78		55940.3		53878.1
866.68		55698		53868.8
866.58		55655.3		53859.2
866.48		55482.5		53849.6
866.38		55689.6		53840.5
866.28		55280		53831.1
866.18		56023.5		53820.7
866.08		56732.1		53809.9
865.98		55864		53798.8
865.88		55996.4		53787.3
865.78		55611.4		53775.8
865.68		56051.2		53764.4
865.58		56507.3		53752.2
865.48		56766		53738.8
865.38		57310.7		53724.1
865.28		57025.2		53708.7
865.18		56875.2		53692.7
865.08		57118.1		53676.3
864.98		57118.6		53660.1
864.88		56952.7		53643.9
864.78		56937.2		53626.9
864.68		57737.5		53609
864.58		58017.5		53590.8
864.48		57489.5		53571.4
864.38		58177.2		53551
864.28		58091.3		53529.4
864.18		59025		53507
864.08		58805.9		53483.7
863.98		58403		53459.5
863.88		59196.2		53433.5
863.78		60024.1		53406.6
863.68		59949.2		53378.6
863.58		60016.2		53348.6
863.48		60557.1		53317.7
863.38		60160.3		53286
863.28		60795.6		53253.7
863.18		60526.4		53219.9
863.08		61633.7		53184.8
862.98		61888.1		53147.9
862.88		62074.5		53109.6
862.78		62244.7		53069.7
862.68		62346.1		53029.1
862.58		62231.6		52987.2
862.48		63133.7		52943.9
862.38		63560		52899.3
862.28		63596.5		52853.2
862.18		63911.5		52805.8
862.08		63510.1		52757.8
861.98		63688.6		52709.5
861.88		63643.9		52660.6
861.78		63997.9		52611.4
861.68		64098.9		52562.1
861.58		63393.7		52512.5
861.48		63792.3		52462.2
861.38		64290.5		52411.3
861.28		64407.1		52360.1
861.18		64217.5		52307.9
861.08		64319.4		52254.7
860.98		64706.3		52201.4
860.88		64250.9		52148.1
860.78		64008.2		52095
860.68		63874.8		52042.2
860.58		63635.4		51989.9
860.48		63854.8		51938.1
860.38		63455.6		51887.2
860.28		62728		51837.5
860.18		62170.4		51789.3
860.08		61651.1		51742.9
859.98		61429.4		51698.6
859.88		60826.3		51655.8
859.78		60761.3		51614.5
859.68		60231.5		51574.3
859.58		60012.2		51535.7
859.48		59434.7		51497.8
859.38		59910.8		51460.9
859.28		59207.3		51425.3
859.18		58661.4		51390.5
859.08		58823.7		51356.3
858.98		58617		51323
858.88		58591.3		51289.8
858.78		58972.7		51256.1
858.68		59209.8		51222
858.58		58983		51187.2
858.48		59280.2		51151.7
858.38		59347.5		51115.5
858.28		59551		51078.9
858.18		59471.2		51040.9
858.08		60532.4		51001.5
857.98		60788.8		50960.9
857.88		60476.8		50918.8
857.78		61193.5		50875
857.68		61302		50829
857.58		62825.9		50781.7
857.48		62238.6		50731.5
857.38		63577.6		50677.9
857.28		65037.7		50621.4
857.18		64483.1		50562.5
857.08		65254.9		50499.7
856.98		66682.2		50433.3
856.88		67555.5		50364
856.78		68203.9		50290.4
856.68		69110.1		50212
856.58		70725.5		50129.3
856.48		71332.6		50041.8
856.38		72825		49949.7
856.28		73319.1		49852.9
856.18		74198.9		49751.5
856.08		75641.9		49644.8
855.98		77287.3		49533.5
855.88		77666.3		49417.5
855.78		78349.3		49297.3
855.68		78727.6		49173.2
855.58		79745.6		49046.9
855.48		79299.4		48918.7
855.38		79290.2		48789.9
855.28		78507.1		48661.6
855.18		77620.8		48535.3
855.08		76724.3		48411.4
854.98		75973.7		48290.9
854.88		74766.1		48174.8
854.78		72689.2		48064.2
854.68		70671		47960.1
854.58		68553.9		47864
854.48		66141.7		47777.4
854.38		63050.1		47700.2
854.28		61193.5		47632.3
854.18		59415.5		47572.8
854.08		58242		47521.9
853.98		55739.5		47477.9
853.88		54757.6		47439.6
853.78		54275.1		47406.8
853.68		52656.4		47379.1
853.58		52092.7		47355.7
853.48		50677.9		47334.9
853.38		51489.2		47317.3
853.28		50354.1		47301.8
853.18		50185.6		47288.3
853.08		49619		47275.7
852.98		49533.1		47265.1
852.88		49155.4		47255.1
852.78		49439		47246.1
852.68		49088.6		47236.9
852.58		49813.8		47228.3
852.48		48782.4		47220.3
852.38		48405.4		47213.1
852.28		48360.7		47206.2
852.18		48831.4		47200.3
852.08		48599		47195.2
851.98		47679		47190.8
851.88		47650.2		47186.6
851.78		48114		47182.9
851.68		48241.8		47179.5
851.58		48136.2		47176.2
851.48		47699.3		47172.4
851.38		48042.3		47169.1
851.28		47592.8		47166.2
851.18		47783.1		47163.1
851.08		48313.6		47160.5
850.98		47187.6		47158.5
850.88		47191.9		47156.8
850.78		47329.4		47155.5
850.68		47295.5		47155.1
850.58		47188.8		47154.1
850.48		47892.9		47152.5
850.38		47982.1		47150.8
850.28		47305.2		47148.7
850.18		47796.7		47146
850.08		47981.2		47143.2
849.98		47982.1		47140.6
849.88		47651.5		47137.5
849.78		47908.9		47134.3
849.68		47986.1		47131.3
849.58		47566.4		47128.7
849.48		47665		47126.1
849.38		47498.1		47123.7
849.28		47760.9		47121.1
849.18		48193.5		47118.8
849.08		47222.2		47116.8
848.98		47270.7		47114.7
848.88		47594.5		47112.6
848.78		47770.5		47110.9
848.68		47637		47109
848.58		47529.3		47107
848.48		47347.6		47104.6
848.38		48133		47102.1
848.28		47843.6		47100
848.18		47107.1		47098.2
848.08		47133.1		47096.7
847.98		47038.5		47096.4
847.88		46807.6		47096.4
847.78		47395.5		47096
847.68		48388.4		47095.5
847.58		47801.8		47094.9
847.48		47240.8		47094.1
847.38		47706.4		47093.3
847.28		47357.1		47092.7
847.18		47662		47092.3
847.08		46918.8		47092
846.98		47024.6		47091.7
846.88		47474.2		47091.5
846.78		47436.4		47091.3
846.68		47130.4		47091.3
846.58		46520.3		47091.2
846.48		47125.6		47096.1
846.38		47243.4		47100.9
846.28		48059		47105.7
846.18		46956		47110.6
846.08		46957.7		47115.4
845.98		48042.3		47120.3
845.88		47364.7		47125.1
845.78		46916.4		47129.9
845.68		47347.5		47134.8
845.58		47924.4		47139.6
845.48		47136.3		47144.4
845.38		47071.9		47149.3
845.28		47645.7		47154.1
845.18		47161.5		47159
845.08		47173.2		47163.8
844.98		47619.8		47168.6
844.88		46720.1		0

## Sheet: Fe2p Scan
							Acquisition Parameters :					Experiment Descriptions :
							Parameter					Experiment\X-Ray001 300um - FG ON\2405153765-a3
							Total acquisition time	1 mins 40.3 secs
							Number of Scans	5
﻿							Source Gun Type	Al K Alpha
Axis	Energy	Elements=	401				Spot Size	300 祄
							Lens Mode	Standard
C:\Users\CSZX\AppData\Local\Temp\VGD{49C46985-01F5-4289-B7F1-64D5C7928A20}.vgd							Analyser Mode	CAE : Pass Energy 60.0 eV
							Energy Step Size	0.100 eV
							Number of Energy Steps	401
Binding Energy (E)				Backgnd.
eV		Counts / s		Counts / s
739.88		38891.8		0
739.78		38853.2		38694.3
739.68		38257.8		38704.1
739.58		38774.7		38713.8
739.48		38688.5		38723.5
739.38		39089.7		38733.3
739.28		38887.8		38714.7
739.18		38225.7		38714.6
739.08		38681.8		38712.4
738.98		39134.2		38710.8
738.88		38951.3		38710.7
738.78		38564.1		38709.2
738.68		38537.8		38706
738.58		39000.2		38703.6
738.48		38970.9		38701.7
738.38		38846.1		38698.2
738.28		38869.4		38692.8
738.18		38935.1		38689.6
738.08		38506.9		38687.3
737.98		38772.4		38682.5
737.88		39367.8		38677
737.78		38993.2		38671.8
737.68		38835.3		38664.6
737.58		38910.1		38659.4
737.48		38333.3		38656.9
737.38		38751.3		38653.6
737.28		39146		38651.3
737.18		38617		38649.6
737.08		38782.2		38645.6
736.98		38799.6		38643
736.88		38440.8		38642.6
736.78		38575.3		38639.6
736.68		39235.9		38635.9
736.58		38926.7		38633.5
736.48		38478.3		38629.2
736.38		38896.6		38623.2
736.28		38940.4		38617.2
736.18		39217.5		38609.7
736.08		39239.1		38600.9
735.98		38772.8		38593.2
735.88		38582.8		38585.9
735.78		38808.5		38579.4
735.68		38981.8		38572
735.58		39422.1		38563.1
735.48		39104.6		38552.3
735.38		39003.6		38540.6
735.28		38962.7		38529.5
735.18		38779.2		38519.3
735.08		39156.1		38510.4
734.98		38743.6		38500.8
734.88		39138.8		38491.4
734.78		38845.2		38481.1
734.68		38970.1		38471.2
734.58		38995.7		38459.3
734.48		39194.6		38447.8
734.38		38978		38435.5
734.28		38996		38424.3
734.18		38629.2		38412.9
734.08		39018.1		38401.9
733.98		39015.6		38394.1
733.88		38167.1		38386.5
733.78		38901.8		38378.5
733.68		38698.8		38372
733.58		38618.4		38366.7
733.48		38672.5		38359.5
733.38		38619.9		38353.1
733.28		38687.2		38346.1
733.18		38791.7		38337.6
733.08		38958.4		38328
732.98		38903.6		38320.1
732.88		38147.4		38312.9
732.78		38493.3		38306
732.68		38691.3		38298.9
732.58		38966.7		38292.8
732.48		38615.8		38284
732.38		38789.8		38273.7
732.28		38829.7		38262
732.18		38979.7		38251.6
732.08		38591.9		38241.9
731.98		38406.1		38234.5
731.88		38175.2		38227.7
731.78		38646.8		38222.4
731.68		38603.3		38219.5
731.58		37987		38216.2
731.48		38479.3		38214.6
731.38		37754.4		38213.7
731.28		38461.5		38211.2
731.18		38386.5		38207.2
731.08		38715.4		38203.1
730.98		38536.7		38196.9
730.88		38801.5		38191
730.78		38242.5		38184.2
730.68		38813.8		38177.2
730.58		38784.6		38171.9
730.48		37521.3		38166.6
730.38		38793.6		38160.7
730.28		38464.6		38155.2
730.18		38523.1		38151
730.08		38045.8		38143.9
729.98		39047.7		38137.5
729.88		38320.2		38131.2
729.78		38392.9		38124
729.68		38897.7		38115.7
729.58		38623.3		38107.1
729.48		39094.3		38097.7
729.38		38721.9		38087.9
729.28		38550.3		38078.3
729.18		38651		38068.7
729.08		38562.8		38059.6
728.98		38795.1		38050.2
728.88		38773.7		38039.6
728.78		39112.6		38028.1
728.68		39069		38015.2
728.58		39252.7		38000.9
728.48		39476.9		37986.1
728.38		38931.3		37971.4
728.28		38982.4		37956.3
728.18		39160.5		37941.4
728.08		39035.4		37927.8
727.98		38687.9		37913.3
727.88		39307.8		37897.8
727.78		39442.9		37881.9
727.68		39298.1		37865.1
727.58		39401.6		37847
727.48		39289.5		37829.3
727.38		38982.2		37811.9
727.28		39123.4		37793.9
727.18		39593.6		37775.4
727.08		39514.5		37755.2
726.98		40075.6		37732
726.88		40557.4		37706.6
726.78		40155.6		37681.1
726.68		39485.9		37653.9
726.58		40350		37626.3
726.48		40114.6		37599.6
726.38		39942		37572.3
726.28		40273.3		37544.1
726.18		39894.3		37516
726.08		40101.3		37488.1
725.98		39876.4		37459.2
725.88		40337		37430.4
725.78		40041		37400.1
725.68		40542		37370.1
725.58		39784.3		37340.2
725.48		39702.6		37309.7
725.38		40483.3		37279.5
725.28		39704.8		37248.8
725.18		40650.9		37215.9
725.08		40823.5		37181.7
724.98		40254.9		37148.1
724.88		39922.4		37114.3
724.78		39691.2		37081.3
724.68		40046.5		37048.1
724.58		40736.3		37014.5
724.48		40316.2		36979.7
724.38		40419.3		36943.1
724.28		40437.9		36907.2
724.18		39527.5		36873.5
724.08		39309		36841.4
723.98		39309.4		36809.8
723.88		39932.7		36779.8
723.78		39460.7		36749.6
723.68		39412.2		36718.6
723.58		39616.9		36688.2
723.48		38823.9		36659
723.38		39147		36630.1
723.28		39093.1		36601.9
723.18		38883.7		36574.7
723.08		38918.1		36546.8
722.98		39049.2		36518.1
722.88		39455.2		36488.9
722.78		39211.6		36459.9
722.68		38591.1		36431.9
722.58		38243.1		36405.4
722.48		38040.4		36380.5
722.38		38478		36356.8
722.28		38425.7		36334.5
722.18		37642.9		36312.7
722.08		37910.6		36291.3
721.98		37629.7		36270.9
721.88		37816.8		36251.1
721.78		37989.8		36231.2
721.68		37625		36211.3
721.58		37714.4		36191
721.48		37768.1		36170.5
721.38		37816.4		36150.3
721.28		37656.6		36130.2
721.18		37507.6		36109.5
721.08		37880.7		36088.1
720.98		38030.1		36067.6
720.88		37225.1		36047.7
720.78		37199.6		36028.5
720.68		36996.7		36009.5
720.58		37618		35992
720.48		37153.2		35974.8
720.38		36931.7		35956.2
720.28		37843.3		35936.1
720.18		37686		35917
720.08		36984.3		35896.4
719.98		37850.5		35875.1
719.88		37194		35855
719.78		37046.7		35834.7
719.68		37685.6		35813.2
719.58		37545.5		35790.7
719.48		38250.2		35767.8
719.38		37273.4		35744
719.28		37390.7		35720.3
719.18		37521.7		35696.1
719.08		37661.3		35672.5
718.98		37760.5		35648.1
718.88		37621.4		35623.6
718.78		37320.1		35599
718.68		37420.5		35574
718.58		37718.4		35549.2
718.48		37532.8		35524.6
718.38		37366.7		35500
718.28		37183.4		35475.9
718.18		37005.1		35451.8
718.08		37586.6		35427.2
717.98		37660.7		35401.9
717.88		37613.6		35375.5
717.78		37647.5		35349
717.68		36924.9		35322.5
717.58		37450.5		35296.1
717.48		37411.1		35269.4
717.38		37667.1		35242.7
717.28		37514.3		35215.1
717.18		37246.6		35186.8
717.08		37712.1		35158.1
716.98		37431		35129.5
716.88		37493.6		35099.3
716.78		38217.8		35067.9
716.68		37781.5		35036.1
716.58		37727.7		35002.9
716.48		38011.4		34968.5
716.38		37988.8		34934.9
716.28		37642.8		34900.7
716.18		37911.1		34865.1
716.08		38311.8		34828.9
715.98		38146.5		34791.4
715.88		38544		34752.1
715.78		38379.7		34711.5
715.68		38491.8		34670.5
715.58		38300		34628.5
715.48		38517.9		34586.2
715.38		38455.8		34543.6
715.28		38372.7		34500.9
715.18		38371.7		34457.1
715.08		38625.6		34413.4
714.98		38275.7		34369.3
714.88		38471.7		34325.3
714.78		38151.4		34280.2
714.68		38712.9		34233.5
714.58		39259.6		34185
714.48		39071.8		34134.9
714.38		39133.2		34082.5
714.28		39126.8		34028.8
714.18		39183.3		33974.3
714.08		39462.9		33917.8
713.98		39904.3		33859.5
713.88		39887.9		33799.6
713.78		39726.6		33737.5
713.68		40088.6		33673.7
713.58		40128.4		33608
713.48		40629		33540.8
713.38		40453.2		33472.3
713.28		40071.1		33402.6
713.18		40503.8		33331.9
713.08		40341.2		33260.9
712.98		40526.2		33188.3
712.88		40931.3		33114
712.78		40738.3		33038.8
712.68		40661		32961.6
712.58		41124.7		32883.4
712.48		40676.7		32804.8
712.38		40874.8		32725.4
712.28		40774.5		32644.7
712.18		41092.6		32563.9
712.08		40818.5		32482.6
711.98		40585.5		32400.5
711.88		40931.4		32316.6
711.78		41443		32232.6
711.68		40827.6		32147.8
711.58		40822.2		32061.8
711.48		40959.4		31975.9
711.38		40445.9		31891.1
711.28		40540.6		31806
711.18		40583.8		31721.1
711.08		40379.9		31636.4
710.98		40469.4		31551.2
710.88		40400.1		31466.9
710.78		39651.1		31384.5
710.68		39223.2		31303.7
710.58		39169.1		31225.6
710.48		38661.4		31149.1
710.38		39168.3		31073.8
710.28		38716.4		31000.1
710.18		38015.6		30928.4
710.08		37719.3		30857.8
709.98		37842		30788.8
709.88		37967.6		30721.3
709.78		37622.1		30654.8
709.68		37181.4		30589.6
709.58		36744.9		30527.3
709.48		35969.6		30468.1
709.38		36019.4		30412.3
709.28		35538.4		30359.3
709.18		35414.9		30308.2
709.08		35528.4		30258.7
708.98		34801.5		30210.2
708.88		35355.7		30163.2
708.78		34467.9		30118.6
708.68		33891.3		30076.6
708.58		33950.2		30037.7
708.48		32970.4		30001.5
708.38		33660.9		29967.5
708.28		33163.7		29934.3
708.18		33299		29902.1
708.08		33252.7		29869.4
707.98		33078		29838.2
707.88		32774.3		29807.8
707.78		32531.9		29777.9
707.68		32936.6		29749.2
707.58		32469.7		29720.5
707.48		32936.4		29692.7
707.38		32232.6		29665.9
707.28		31787.6		29640
707.18		32374.7		29613.8
707.08		32497		29588.7
706.98		32302.3		29562.7
706.88		32545.3		29536
706.78		32065.8		29510.4
706.68		31674.6		29485.9
706.58		31796.1		29462.2
706.48		31793.3		29440.2
706.38		31503		29419.2
706.28		31384.5		29398.6
706.18		31421.2		29378.2
706.08		31563.4		29357.8
705.98		31736.6		29337.4
705.88		31434.4		29317.2
705.78		31171		29296.9
705.68		31379.1		29277
705.58		31284.4		29257.7
705.48		31312.2		29238.5
705.38		31318.6		29219.8
705.28		30809.5		29201.9
705.18		30850.9		29184.6
705.08		30905.5		29167.8
704.98		30984.3		29151.2
704.88		31079.6		29134.7
704.78		30741.8		29118.6
704.68		30538.3		29103.9
704.58		30129.6		29088.6
704.48		31205.8		29074.4
704.38		30427.8		29061.1
704.28		30188.3		29048.6
704.18		30044.9		29036.1
704.08		30039.8		29025.1
703.98		30408.5		29015.2
703.88		29754.2		29006
703.78		29754.9		28997.2
703.68		29834.2		28989.3
703.58		29436.4		28982.6
703.48		29770.4		28976.1
703.38		29649.2		28969.4
703.28		29773.7		28963.3
703.18		29545.1		28957.4
703.08		29271.7		28951.7
702.98		29627.7		28946.6
702.88		29291.9		28942.6
702.78		29144.9		28939.4
702.68		29118.1		28936.3
702.58		29221.7		28934.9
702.48		28647.4		28933
702.38		28542.5		28925.9
702.28		29234.4		28916.8
702.18		29105.7		28894.5
702.08		29474.1		28839.3
701.98		29325		28776.2
701.88		28475.3		28717.6
701.78		28839.9		28665.8
701.68		28681.8		28637.8
701.58		28670.9		28633.6
701.48		28521		28517.6
701.38		28494.8		28465.4
701.28		28219.7		28406
701.18		28420.7		28338.6
701.08		28373.7		28335.3
700.98		28183.9		28292.9
700.88		28478.3		28259.8
700.78		28008		28237.4
700.68		28254.8		28235
700.58		28262		28168.9
700.48		28172.6		28167.1
700.38		28147.1		28153.9
700.28		28017.3		28102.4
700.18		28288.6		28087.3
700.08		27919.3		28075
699.98		28035.5		28270
699.88		28836.6		0

## Sheet: C1s Scan
							Acquisition Parameters :					Experiment Descriptions :
							Parameter					Experiment\X-Ray001 300um - FG ON\2405153765-a3
							Total acquisition time	47.8 secs
							Number of Scans	5
﻿							Source Gun Type	Al K Alpha
Axis	Energy	Elements=	191				Spot Size	300 祄
							Lens Mode	Standard
C:\Users\CSZX\AppData\Local\Temp\VGD{87C35029-4511-44F0-B3CB-AD9ADDA5B3C0}.vgd							Analyser Mode	CAE : Pass Energy 60.0 eV
							Energy Step Size	0.100 eV
							Number of Energy Steps	191
Binding Energy (E)				Backgnd.
eV		Counts / s		Counts / s
297.88		9890.7		0
297.78		9851.97		9793.2
297.68		9902.38		9731.73
297.58		9527.76		9731.54
297.48		9644.82		9731.33
297.38		9746.93		9730.91
297.28		10127.8		9730.29
297.18		10178.1		9729.16
297.08		10210.1		9727.58
296.98		10262.7		9725.24
296.88		10755.7		9722.35
296.78		10863.5		9719.03
296.68		10736.6		9714.87
296.58		11351.8		9709.36
296.48		12056.6		9702.76
296.38		12212		9694.75
296.28		12757.1		9685.26
296.18		12705.3		9674.54
296.08		12973.7		9662.75
295.98		13453.3		9649.49
295.88		14154.8		9635.39
295.78		13837.7		9620.15
295.68		14176.3		9604.28
295.58		13771.4		9588.14
295.48		13742.2		9572.2
295.38		13802.4		9556.45
295.28		13512.9		9541.3
295.18		13271.8		9526.77
295.08		12870.6		9513.04
294.98		12583.2		9500.46
294.88		12181.3		9488.9
294.78		12063.5		9478.25
294.68		11969.7		9468.44
294.58		11692.6		9458.9
294.48		12161.5		9449.84
294.38		11499.9		9440.95
294.28		11766		9432
294.18		12021.1		9422.73
294.08		12086.1		9413.18
293.98		12504.4		9402.12
293.88		13486.6		9389.52
293.78		13813.5		9375.27
293.68		14214.6		9358.75
293.58		15085.4		9339.72
293.48		15844.6		9318.55
293.38		16314.2		9295.47
293.28		16301.5		9270.52
293.18		16639.6		9244.1
293.08		16975.9		9216.67
292.98		17100.4		9188.26
292.88		17502.8		9158.78
292.78		17632.3		9129.02
292.68		16893.6		9099.51
292.58		16495		9070.36
292.48		16470.3		9042.4
292.38		15761.3		9016.57
292.28		14595.5		8992.55
292.18		14328.9		8970.76
292.08		13358.6		8951.65
291.98		12722.7		8935.3
291.88		11932.9		8921.13
291.78		11552.7		8909.44
291.68		10893.4		8899.84
291.58		10470.7		8892.35
291.48		9812.82		8886.54
291.38		9622.2		8882.15
291.28		9590.43		8879
291.18		9192.41		8876.76
291.08		9206.69		8875.2
290.98		8891.73		8874.18
290.88		8876.72		8873.71
290.78		8848.87		8873.49
290.68		8836.75		8873.29
290.58		8913.4		8872.99
290.48		9109.69		8872.58
290.38		9122.49		8871.91
290.28		9470.91		8870.96
290.18		9488.85		8869.64
290.08		9786.27		8868.1
289.98		9623.19		8866.26
289.88		9811.06		8864.09
289.78		10232		8861.38
289.68		10780.8		8858.24
289.58		10778.5		8854.43
289.48		11168.5		8849.89
289.38		11545.6		8844.84
289.28		11406.5		8839.31
289.18		11894		8833.25
289.08		12009.7		8826.85
288.98		11920		8820.25
288.88		12005		8813.39
288.78		11991.9		8806.18
288.68		12672.5		8798.82
288.58		12336.8		8791.33
288.48		12187.7		8783.82
288.38		12027.5		8776.17
288.28		12265		8768.81
288.18		11948.1		8761.56
288.08		12062.9		8754.19
287.98		12428.5		8746.68
287.88		12320.6		8739.29
287.78		11919.9		8731.7
287.68		12419.9		8724.11
287.58		11992.5		8716.73
287.48		11932.7		8709.44
287.38		12039.3		8701.97
287.28		12313		8694.42
287.18		12585		8686.74
287.08		12267.7		8678.79
286.98		12517.9		8670.4
286.88		13052.4		8661.43
286.78		13622.5		8651.93
286.68		13821		8641.46
286.58		14518.8		8629.87
286.48		15106.4		8616.76
286.38		16585.6		8602.08
286.28		17290.4		8585.39
286.18		18476.7		8566.52
286.08		19642.8		8545.58
285.98		19890.6		8522.11
285.88		22466.5		8495.62
285.78		24333.1		8465.84
285.68		26146.6		8432.46
285.58		28028.7		8394.69
285.48		30105.2		8352.73
285.38		32222.2		8306.32
285.28		34653.4		8255.74
285.18		35826.1		8201.06
285.08		37474.1		8142.87
284.98		38165.4		8081.84
284.88		38678.7		8018.98
284.78		38693.4		7955.15
284.68		37840.4		7891.33
284.58		37163.9		7828.52
284.48		35464.4		7767.47
284.38		34249.7		7709.49
284.28		31131.4		7655.21
284.18		28809.6		7605.54
284.08		26033.5		7561.01
283.98		23043.7		7522.01
283.88		20990.1		7488.26
283.78		18493.4		7459.55
283.68		16758.9		7435.53
283.58		14791.7		7415.58
283.48		13314		7399.36
283.38		12066.1		7386.2
283.28		11170.9		7375.73
283.18		10331.9		7367.36
283.08		9782.07		7360.71
282.98		9217.62		7355.43
282.88		8767.13		7351.3
282.78		8445.02		7347.9
282.68		8565.82		7345.05
282.58		8488.05		7342.57
282.48		8310.62		7340.46
282.38		7892.81		7338.6
282.28		7850.34		7336.96
282.18		8014.05		7335.6
282.08		7830.18		7334.51
281.98		7660.76		7333.52
281.88		7673.08		7332.67
281.78		7487.93		7332.04
281.68		7494.61		7331.7
281.58		7147.17		7331.31
281.48		7775.27		7330.91
281.38		7695.76		7330.43
281.28		7671.22		7329.89
281.18		7650.99		7329.15
281.08		7592.59		7328.64
280.98		7257.66		7328.24
280.88		7411.61		7327.9
280.78		7537.57		7327.66
280.68		7389.98		7327.57
280.58		7257.75		7327.37
280.48		7523.33		7327.1
280.38		7562.33		7326.88
280.28		7421.08		7326.61
280.18		7497.33		7326.32
280.08		7311.81		7326.18
279.98		7166.6		7326.16
279.88		7294.73		7326.16
279.78		7324.01		7326.16
279.68		7506.15		7326.08
279.58		7526.96		7325.87
279.48		7459.62		7325.67
279.38		7291.51		7325.31
279.28		7707.25		7324.98
279.18		7421.43		7324.79
279.08		7180.24		7324.63
278.98		7239.79		7324.4
278.88		7456.13		0

## Sheet: Peak Table
Peak Table :
	Name	Start BE	Peak BE	End BE	Height CPS	FWHM eV	Area (P) CPS.eV	Area (N) TPP-2M	Atomic %	Peak Type	Q	SF ALTHERMO1	TXFN	Backgnd	PP Height CPS	PP Hgt (N)	PP At. %	Title	File Name
	C1s	297.78	284.84	278.98	30615.8	1.83	95748.4	1342.65	44.55	Standard	1	1	1	Smart	31531.5	110.54	44.04	C1s Scan	C:\Users\CSZX\AppData\Local\Temp\VGD{87C35029-4511-44F0-B3CB-AD9ADDA5B3C0}.vgd
	Fe2p	739.78	711.57	699.98	8687.01	5.66	89880.7	122.3	4.06	Standard	1	14.353	1	Smart	12903	4.39	1.75	Fe2p Scan	C:\Users\CSZX\AppData\Local\Temp\VGD{49C46985-01F5-4289-B7F1-64D5C7928A20}.vgd
	Ni2p	889.78	855.5	844.98	30252.2	2.61	246317	269.22	8.93	Standard	1	20.765	1	Smart	32779.1	8.96	3.57	Ni2p Scan	C:\Users\CSZX\AppData\Local\Temp\VGD{CD8CF8D7-CDAE-4ACC-8B92-9A8DF479FB4C}.vgd
	O1s	544.78	531.16	524.98	81587.1	2.1	205178	1189.59	39.48	Standard	1	2.881	1	Smart	83769.7	121.42	48.38	O1s Scan	C:\Users\CSZX\AppData\Local\Temp\VGD{E56530D2-8A26-4D5A-8D36-C3340861105A}.vgd
	S2p	174.78	168.7	156.98	2993.19	2.59	12924.9	89.74	2.98	Standard	1	1.881	1	Smart	3278.12	5.69	2.27	S2p Scan	C:\Users\CSZX\AppData\Local\Temp\VGD{834B343A-B5F6-4D48-8E10-D08095789464}.vgd

## Sheet: Titles
10:55:28 Friday, June 28, 2024
I:\0627\X-Ray001 300um - FG ON\2405153765-a3\3.xlsx
Data Grid 37
Data Files :	Title	File Name	Comment
	XPS Survey	C:\...\VGD{CFCB7E7A-0013-4C36-83C2-C2DAB65894B5}.vgd
	S2p Scan	C:\...\Temp\VGD{834B343A-B5F6-4D48-8E10-D08095789464}.vgd
	O1s Scan	C:\...\VGD{E56530D2-8A26-4D5A-8D36-C3340861105A}.vgd
	Ni2p Scan	C:\...\VGD{CD8CF8D7-CDAE-4ACC-8B92-9A8DF479FB4C}.vgd
	Fe2p Scan	C:\...\Temp\VGD{49C46985-01F5-4289-B7F1-64D5C7928A20}.vgd
	C1s Scan	C:\...\Temp\VGD{87C35029-4511-44F0-B3CB-AD9ADDA5B3C0}.vgd
	XPS Survey	D:\...\X-Ray001 300um - FG ON\2405153765-a3\XPS Survey.VGD
	S2p Scan	D:\...\X-Ray001 300um - FG ON\2405153765-a3\S2p Scan.VGD
	O1s Scan	D:\...\X-Ray001 300um - FG ON\2405153765-a3\O1s Scan.VGD
	Ni2p Scan	D:\...\X-Ray001 300um - FG ON\2405153765-a3\Ni2p Scan.VGD
	Fe2p Scan	D:\...\X-Ray001 300um - FG ON\2405153765-a3\Fe2p Scan.VGD
	C1s Scan	D:\...\X-Ray001 300um - FG ON\2405153765-a3\C1s Scan.VGD
